# Supplementary material for: Determinants of Neonatal Mortality at the David Bernardino Paediatric Hospital in Angola: A Case-Control Study Using Theoretical Frameworks
Source: Preprints.org preprint supplement (doi:10.20944/preprints202410.0434.v1), 2024-10-07
Supplement: Supplementary file 1 [file supplementary]

**Data Collection Form**

**1. Sex**

- Question: *What is the sex of the newborn?*
  - Male
  - Female

**2. Status at Discharge**

- Question: *What is the status of the newborn at discharge?*
  - Case
  - Control

**3. Gestational Age**

- Question: *What is the gestational age of the newborn, in completed weeks?*
  - Less than 37 weeks (Preterm)
  - Between 37 and 42 weeks (Term)
  - More than 42 weeks (Post-term)

**4. Birth Weight**

- Question: *What was the birth weight of the newborn, in grams?*
  - Less than 2500 grams (Low birth weight)
  - Between 2500 and 4000 grams (Normal birth weight)
  - More than 4000 grams (High birth weight)

**5. Apgar Score**

- Question: *What was the Apgar score of the newborn at one minute and five minutes after birth?*
  - Apgar at 1 minute: [ ] (Field to fill in with number)
  - Apgar at 5 minutes: [ ] (Field to fill in with number)

**6. Crying at Birth**

- Question: *Did the newborn cry at birth?*
  - Yes
  - No

**7. Neonatal Age**

- Question: *What is the neonatal age of the newborn, in completed days?*
  - (Field to fill in with number)

**8.** Time, in days, between the onset of illness and hospital admission

[ ] Less than 1 day (less than 24 hours)
[ ] 1 to 2 days
[ ] 3 days or more

**09. Total Length of Hospital Stay**

- Question: *What is the total length of hospital stay, in days?*
  - (Field to fill in with number)

**10. Maternal Age**

- Question: *What is the mother's age at the time of delivery, in years?*
  - Under 20 years
  - Between 20 and 35 years
  - 35 years or older

**11. Maternal Parity**

- Question: *How many previous pregnancies has the mother had, including the current one?*
  - Fewer than 3 pregnancies
  - Three or more pregnancies

**12. Place of Residence**

- Question: *What is the mother's place of residence?*
  - Rural
  - Urban

**13. Type of Delivery**

- Question: *What was the method of delivery used for the baby?*
  - Normal (Vaginal)
  - Caesarean

**14. Place of Delivery**

- Question: *Where did the delivery of the baby take place?*
  - Hospital
  - At home

**15. Number of Antenatal Consultations**

- Question: *How many antenatal consultations were conducted during the pregnancy?*
  - Fewer than 4 consultations (Inadequate)
  - 4 or more consultations (Adequate)

**16. Maternal HIV Status**

- Question: *What is the mother's HIV status during pregnancy?*
  - HIV positive
  - HIV negative

**17. Breastfeeding**

- Question: *Is the newborn being exclusively breastfed since birth?*
  - Yes
  - No

**18. Vaccinations**

- Question: *Did the mother receive all the recommended vaccinations during pregnancy?*
  - Received
  - Not received
- Question: *Did the newborn receive all the recommended vaccinations at birth?*
  - Received
  - Not received

**19. Umbilical Cord Care**

- Question: *How was the umbilical cord care managed after birth?*
  - Adequate (Use of antiseptics, such as 70% ethanol)
  - Inadequate (Use of substances such as salt, palm oil, clay, leaves, and other non-medical materials)

**20. Diagnosis**

- Question: *What is the diagnosis of the newborn?*
  - (Field to fill in with diagnosis)
